# Supplementary material for: Niclosamide reduces glucagon sensitivity via hepatic PKA inhibition in obese mice: Implications for glucose metabolism improvements in type 2 diabetes
Source: PubMed Central journal article supplement (PMC5214666; doi:10.1038/srep40159), 2017-01-05
Supplement: srep40159-s1.pdf [file srep40159-s1.pdf]

## **Supplementary Information**

### **Niclosamide reduces glucagon sensitivity via hepatic PKA inhibition in obese mice: Implications for glucose metabolism improvements in type 2 diabetes.**

Md. Kamrul Hasan Chowdhury<sup>1</sup>, Nigel Turner<sup>1</sup>, Nicholas L Bentley<sup>1</sup>, Abhirup Das<sup>1</sup>, Lindsay E Wu<sup>1</sup>, Dulama Richani<sup>2</sup>, Sonia Bustamante<sup>3</sup>, Robert Gilchrist<sup>2</sup>, Margaret J Morris<sup>1</sup>, Peter R Shepherd<sup>4</sup> and Greg C Smith<sup>1,\*</sup>

<sup>1</sup>Department of Pharmacology, School of Medical Sciences, UNSW Australia, Sydney, Australia

<sup>2</sup>School of Women's & Children Health, UNSW Australia, Sydney, Australia

<sup>3</sup>Bioanalytical Mass Spectrometry Facility, UNSW Australia, Sydney, Australia

<sup>4</sup>Department of Molecular Medicine & Pathology, University of Auckland, Auckland, New Zealand

### **Correspondence**

Greg C. Smith

Telephone: +61 (2) 93858075

Fax: +61 (2) 93850023

E-mail: g.smith@unsw.edu.au

## Supplementary Figure S1

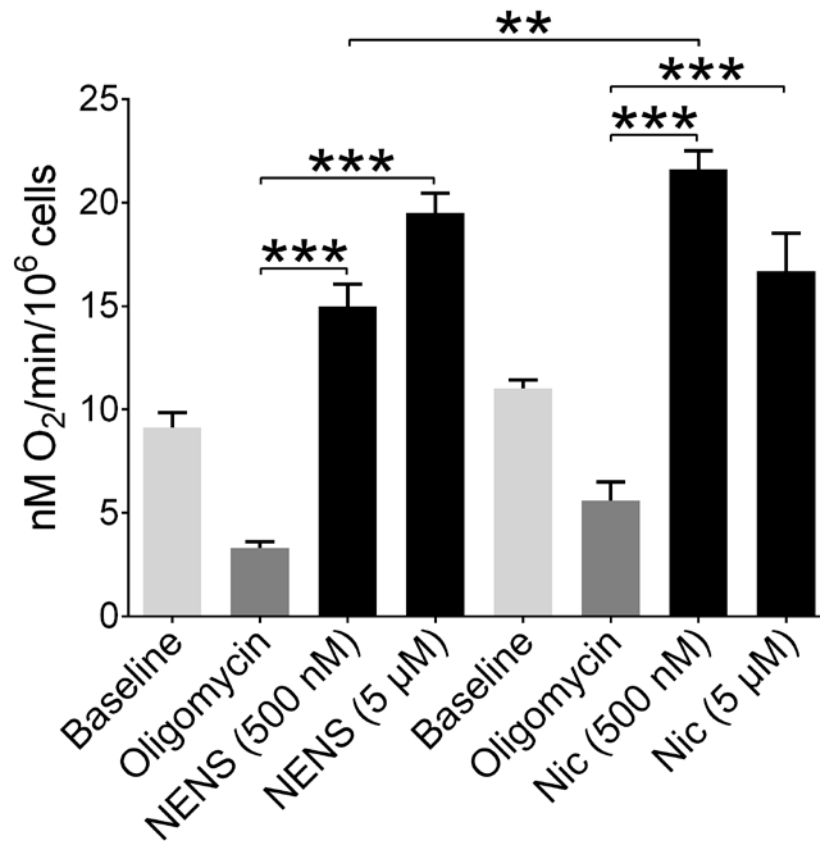

**Supplementary Figure S1.** NENS or Nic uncouples mitochondrial respiration. Oxygen consumption of isolated C57BL/6 hepatocytes using the Clark electrode with oligomycin and two forms of niclosamide (NENS or Nic; 500 nM and 5 μM). Each experiment is in duplicate and repeated three times independently. Statistical significance (P) was determined by multiple comparisons Two-way ANOVA test. The data is showed as the mean ± S.E.M. \*p<0.01 or \*\*\*p<0.001.
